# Supplementary material for: Type I interferon signaling induces melanoma cell-intrinsic PD-1 and its inhibition antagonizes immune checkpoint blockade
Source: PubMed Central journal article supplement — Nat Commun. 2024 Aug 26;15:7165. doi: 10.1038/s41467-024-51496-2 (PMC11347607; doi:10.1038/s41467-024-51496-2), 2024-08-26
Supplement: 41467_2024_51496_MOESM3_ESM.pdf [file 41467_2024_51496_MOESM3_ESM.pdf]

### **Description of Additional Supplementary Files**

**Supplementary Data 1** - List of top 100 genes with chromatin opening induced by both IFN- $\alpha$  and IFN- $\beta$  treatment of YUMM4.1 melanoma cells. Related to Fig. 3b.
